# Supplementary material for: Auxin-induced WUS expression is essential for embryonic stem cell renewal during somatic embryogenesis in Arabidopsis
Source: PubMed Central journal article supplement (PMC2788036; doi:10.1111/j.1365-313x.2009.03880.x), 2009-05-07

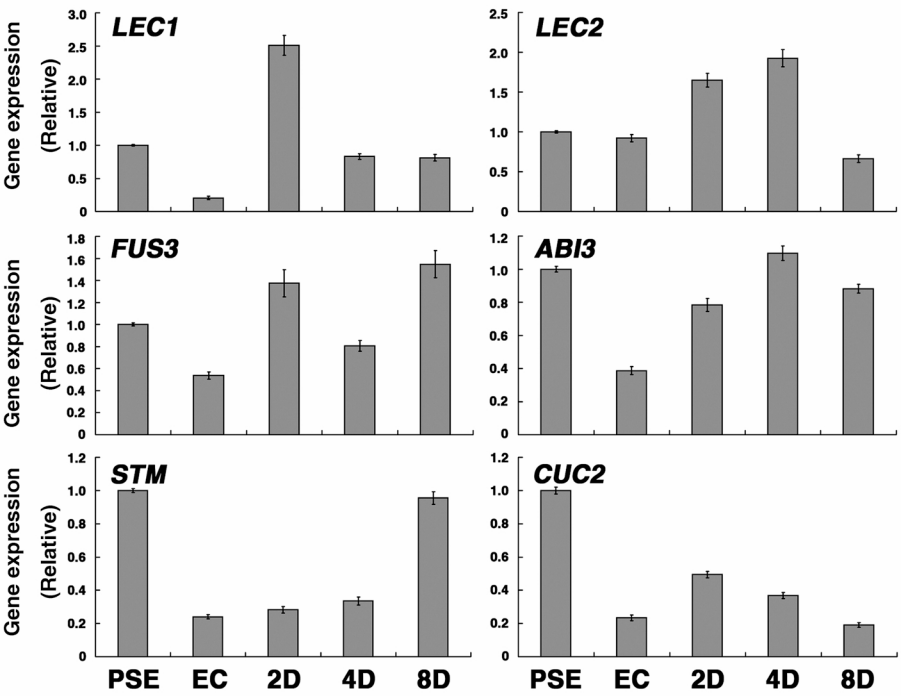

Supplement: tpj0059-0448-SD1.pdf [file tpj0059-0448-SD1.pdf]
